# Supplementary material
Source: PubMed Central journal article supplement (PMC4033277)
Supplement: gutjnl-2012-304190-s3.pdf [file gutjnl-2012-304190-s3.pdf]

# Supplemental Figure 1.

## Breeding strategy

**Nod2<sup>+/+</sup>** × **Nod2<sup>-/-</sup>**

**Nod2<sup>+/+</sup>** Wild-type  
**Nod2<sup>+/-</sup>** Nod2-het  
**Nod2<sup>-/-</sup>** Nod2-null

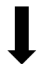

**Nod2<sup>+/-</sup>** **Nod2<sup>+/-</sup>**  
**Nod2<sup>+/-</sup>** **Nod2<sup>+/-</sup>**

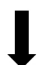

**Nod2<sup>+/-</sup>** × **Nod2<sup>+/-</sup>**

Re-bred to produce additional Nod2<sup>+/+</sup> and Nod2<sup>-/-</sup> littermates

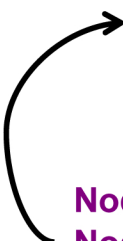

**Nod2<sup>+/-</sup>** **Nod2<sup>+/+</sup>** **Nod2<sup>-/-</sup>**  
**Nod2<sup>+/-</sup>** **Nod2<sup>+/+</sup>** **Nod2<sup>-/-</sup>**  
**Nod2<sup>+/-</sup>** **Nod2<sup>+/+</sup>** **Nod2<sup>-/-</sup>**  
**Nod2<sup>+/-</sup>** **Nod2<sup>+/+</sup>** **Nod2<sup>-/-</sup>**

- weaned to separate cages by sex
- sacrificed at 8-12 wk
- allowed for housing of Nod2<sup>+/+</sup> and Nod2<sup>-/-</sup> in identical environmental conditions

- previous work (Rehman *et al.*, 2011) used Nod2<sup>+/+</sup> and Nod2<sup>-/-</sup> littermates to start homozygous inter-cross lines
- Nod2<sup>+/+</sup> and Nod2<sup>-/-</sup> mice were then housed separately, and hence not exposed to identical environmental conditions
